# Supplementary material for: Understanding patterns and processes in models of trophic cascades
Source: PubMed Central journal article supplement (PMC4237542; doi:10.1111/ele.12200), 2013-10-27

# Ecology Letters Supporting Information

## Understanding patterns and processes in models of trophic cascades

Michael R. Heath<sup>1</sup>, Douglas C. Speirs<sup>1</sup>, John H. Steele<sup>2</sup>

<sup>1</sup>University of Strathclyde, Department of Mathematics and Statistics, Livingstone Tower, Glasgow, G1 1XP, UK. E-mail: [m.heath@strath.ac.uk](mailto:m.heath@strath.ac.uk); [d.c.speirs@strath.ac.uk](mailto:d.c.speirs@strath.ac.uk)

<sup>2</sup>Marine Policy Centre, Woods Hole Oceanographic Institution, Woods Hole, MA 02543, USA. E-mail: [jsteele@whoi.edu](mailto:jsteele@whoi.edu)

---

### Appendix S1. Analytical steady state solutions to differential equations describing food chain model dynamics

**Table S1.** Analytical steady state solutions to equations 12 and 13 in the main text, for a Lotka Volterra system with density-dependent mortality regulation.

| Rate equations                                             | Steady state solutions for $x_1$ and $x_2$                              |
|------------------------------------------------------------|-------------------------------------------------------------------------|
| $\frac{dx_1}{dt} = \sigma x_1 - x_1 x_2 - \lambda_1 x_1^2$ | $x_1^* = \frac{(\delta + \lambda_2 \sigma)}{(1 + \lambda_1 \lambda_2)}$ |
| $\frac{dx_2}{dt} = x_1 x_2 - \delta x_2 - \lambda_2 x_2^2$ | $x_2^* = \frac{(\sigma - \lambda_1 \delta)}{(1 - \lambda_1 \lambda_2)}$ |

**Table S2.** Analytical steady state solutions to equations 14 and 15 in the main text, for a Lotka Volterra system with consumer density-dependent uptake regulation.

| Rate equations                                                        | Steady state solutions for $x_1$ and $x_2$         |
|-----------------------------------------------------------------------|----------------------------------------------------|
| $\frac{dx_1}{dt} = \sigma x_1 - \frac{x_1 x_2}{(\rho_2 + \nu_2 x_2)}$ | $x_1^* = \frac{\delta \rho_2}{(1 - \sigma \nu_2)}$ |
| $\frac{dx_2}{dt} = \frac{x_1 x_2}{(\rho_2 + \nu_2 x_2)} - \delta x_2$ | $x_2^* = \frac{\sigma \rho_2}{(1 - \sigma \nu_2)}$ |

**Table S3.** Analytical steady state solutions to equations 16 - 18 in the main text, for a 3-level food chain (n=2) with a linear prey dependency of consumer uptake rate and top-level mortality regulation, with and without chemostat bottom-level regulation.

| Rate equations                                                               | Steady state solutions for $x_0$ , $x_1$ and $x_2$ without bottom-level regulation ( $\varphi = 0$ ) | Steady state solutions for $x_0$ , $x_1$ and $x_2$ with chemostat bottom-level regulation ( $\varphi = 1$ )                                                                                                    |
|------------------------------------------------------------------------------|------------------------------------------------------------------------------------------------------|----------------------------------------------------------------------------------------------------------------------------------------------------------------------------------------------------------------|
| $\frac{dx_0}{dt} = \varphi(I - a_1 x_0 x)$                                   | $x_0^* = x(0)$                                                                                       | $x_0^* = \frac{I}{a_1 x_1^*}$                                                                                                                                                                                  |
| $\frac{dx_1}{dt} = \varepsilon_1 a_1 x_0 x_1 - a_2 x_1 x_2$                  | $x_1^* = \frac{\delta + \lambda_2 x_2^*}{\varepsilon_2 a_2}$                                         | $x_1^* = \frac{\varepsilon_1 I}{a_2 x_2^*}$                                                                                                                                                                    |
| $\frac{dx_2}{dt} = \varepsilon_2 a_2 x_1 x_2 - \delta x_2 - \lambda_2 x_2^2$ | $x_2^* = \frac{\varepsilon_1 a_1 x_0^*}{a_2}$                                                        | $x_2^* = \begin{cases} \frac{-\delta + \sqrt{\delta^2 + 4\varepsilon_1 \varepsilon_2 I \lambda_2}}{2\lambda_2} & \lambda_2 \neq 0 \\ \frac{\varepsilon_1 \varepsilon_2 I}{\delta} & \lambda_2 = 0 \end{cases}$ |

**Table S4.** Analytical steady state solutions to equations 19 - 21 in the main text, for a 3-level food chain (n=2) with consumer uptake rate determined by linear prey-dependency and consumer density-dependence, with and without chemostat bottom-level regulation.

| Rate equations                                                                   | Steady state solutions for $x_0$ , $x_1$ and $x_2$ without bottom-level regulation ( $\varphi = 0$ ) | Steady state solutions for $x_0$ , $x_1$ and $x_2$ with chemostat bottom-level regulation ( $\varphi = 1$ ) |
|----------------------------------------------------------------------------------|------------------------------------------------------------------------------------------------------|-------------------------------------------------------------------------------------------------------------|
| $\frac{dx_0}{dt} = \varphi(I - a_1 x_0 x)$                                       | $x_0^* = x(0)$                                                                                       | $x_0^* = \frac{I}{a_1 x_1^*}$                                                                               |
| $\frac{dx_1}{dt} = \varepsilon_1 a_1 x_0 x_1 - \frac{a_2 x_1 x_2}{\rho_2 + x_2}$ | $x_1^* = \frac{\delta x_2^*}{\varepsilon_1 \varepsilon_2 a_1 x_0^*}$                                 | $x_1^* = \frac{\varepsilon_1 I}{a_2} \left( \frac{\rho_2}{x_2^*} + \nu_2 \right)$                           |
| $\frac{dx_2}{dt} = \frac{\varepsilon_2 a_2 x_1 x_2}{\rho_2 + x_2} - \delta x_2$  | $x_2^* = \frac{\varepsilon_1 a_1 x_0^* \rho_2}{a_2 - \varepsilon_1 a_1 x_0^* \nu_2}$                 | $x_2^* = \frac{\varepsilon_1 \varepsilon_2 I}{\delta}$                                                      |

**Table S5.** Analytical steady state solutions to equations 22 - 24 in the main text, for a 3-level food chain (n=2) with a Type-II prey-dependency and top-level mortality regulation, with and without chemostat bottom-level regulation

| Rate equations                                                                                  | Steady state solutions for $x_0$ , $x_1$ and $x_2$ without bottom-level regulation ( $\varphi = 0$ )                                                                             | Steady state solutions for $x_0$ , $x_1$ and $x_2$ with chemostat bottom-level regulation ( $\varphi = 1$ )                                                                                                |
|-------------------------------------------------------------------------------------------------|----------------------------------------------------------------------------------------------------------------------------------------------------------------------------------|------------------------------------------------------------------------------------------------------------------------------------------------------------------------------------------------------------|
| $\frac{dx_0}{dt} = \varphi \left( I - \frac{a_1 x_0 x_1}{k_0 + x_0} \right)$                    | $x_0^* = x(0)$                                                                                                                                                                   | $x_0^* = \frac{I k_0}{(a_1 x_1^* - I)}$                                                                                                                                                                    |
| $\frac{dx_1}{dt} = \frac{\varepsilon_1 a_1 x_0 x_1}{k_0 + x_0} - \frac{a_2 x_1 x_2}{k_1 + x_1}$ | $x_1^* = \frac{a_2 x_2^* (k_0 + x_0^*)}{\varepsilon_1 a_1 x_0^*} - k_1$                                                                                                          | $x_1^* = \frac{\varepsilon_1 k_1 I}{(a_2 x_2^* - \varepsilon_1 I)}$                                                                                                                                        |
| $\frac{dx_2}{dt} = \frac{\varepsilon_2 a_2 x_1 x_2}{k_1 + x_1} - \delta x_2 - \lambda_2 x_2^2$  | $x_2^* = \frac{(\varepsilon_2 a_2 - \delta) \pm \sqrt{(\delta - \varepsilon_2 a_2)^2 + \frac{4\lambda_2 \varepsilon_2 \varepsilon_1 a_1 k_1 x_0^*}{(k_0 + x_0^*)}}}{2\lambda_2}$ | $x_2^* = \begin{cases} \frac{-\delta + \sqrt{\delta^2 + 4\varepsilon_1 \varepsilon_2 I \lambda_2}}{2\lambda_2} & \lambda \neq 0 \\ \frac{\varepsilon_1 \varepsilon_2 I}{\delta} & \lambda = 0 \end{cases}$ |

**Table S6.** Analytical steady state solutions to equations 25 - 27 in the main text, for a 3-level food chain (n=2) with consumer density-dependent non-linear (Type-II) prey-dependency, with and without chemostat bottom-level regulation.

| Rate equations                                                                                              | Steady state solutions for $x_0$ , $x_1$ and $x_2$ without chemostat bottom-level regulation ( $\varphi = 0$ )                                          | Steady state solutions for $x_0$ , $x_1$ and $x_2$ with chemostat bottom-level regulation ( $\varphi = 1$ ) |
|-------------------------------------------------------------------------------------------------------------|---------------------------------------------------------------------------------------------------------------------------------------------------------|-------------------------------------------------------------------------------------------------------------|
| $\frac{dx_0}{dt} = \varphi \left( I - \frac{a_1 x_0 x_1}{k_0 + x_0} \right)$                                | $x_0^* = x(0)$                                                                                                                                          | $x_0^* = \frac{I k_0}{(a_1 x_1^* - I)}$                                                                     |
| $\frac{dx_1}{dt} = \frac{\varepsilon_1 a_1 x_0 x_1}{k_0 + x_0} - \frac{a_2 x_1 x_2}{k_1 + x_1 + \nu_2 x_2}$ | $x_1^* = \frac{\delta x_2^* (k_0 + x_0^*)}{\varepsilon_1 \varepsilon_2 a_1 x_0^*}$                                                                      | $x_1^* = \frac{\varepsilon_1 I (k_1 + \rho_2 x_2^*)}{(a_2 x_2^* - \varepsilon_1 I)}$                        |
| $\frac{dx_2}{dt} = \frac{\varepsilon_2 a_2 x_1 x_2}{k_1 + x_1 + \nu_2 x_2} - \delta x_2$                    | $x_2^* = \frac{\varepsilon_1 \varepsilon_2 a_1 k_1 x_0^*}{\varepsilon_2 (a_2 k_2 + a_2 x_0^* - \varepsilon_1 a_1 \rho_2 x_0^*) - \delta (k_0 + x_0^*)}$ | $x_2^* = \frac{\varepsilon_1 \varepsilon_2 I}{\delta}$                                                      |

**Figure S1.** Analytical steady states of a simple food chain system with non-linear Type-II prey-dependency (equations 22-27), to top-down (TD) and bottom-up (BU) forcing, depending on whether regulation is located at the bottom-level (BL), top-level (TL) or both, of the food chain. Parameters used in the analysis were  $a_i = 1$ ;  $\varepsilon_i = 1$ ,  $\delta = 0.1$  (except when treated as the driving variable),  $\lambda = 0.1$ ,  $\nu = 0.1$ . Solid lines for cases 2, 3, 5 & 6 show the response with top-level mortality regulation, dashed with top-level uptake regulation.

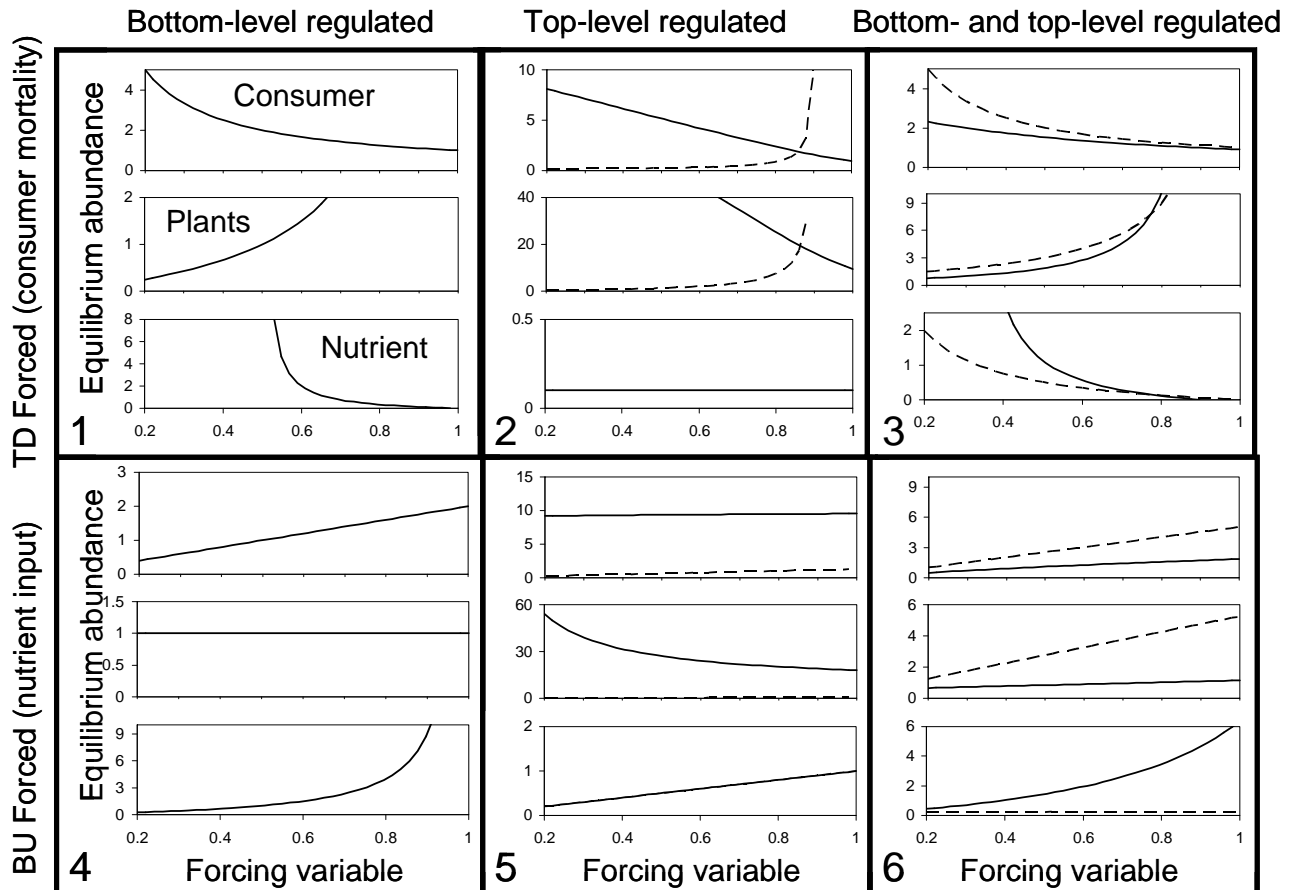

**Figure S2.** Proportional response of the 4-level food chain models to a doubling of top-down forcing (density independent mortality; top row), or bottom-up forcing (nutrient input rate; bottom row), with mortality or uptake regulation at the top and interior-trophic levels, i.e. as Fig.5 in the main manuscript, except with regulation at interior as well as at the top ( $\lambda_i = 1, v_i = 1, i = 1$  to  $n$ ). Left column, linear prey dependency; right column, Type-II non-linear prey dependency. Pale shaded bars, uptake regulation; dark shaded, mortality regulation. The proportional response is calculated as in eq. 28 of the main text, i.e.  $\log_2(\text{abundance with altered forcing/abundance with default forcing})$ .

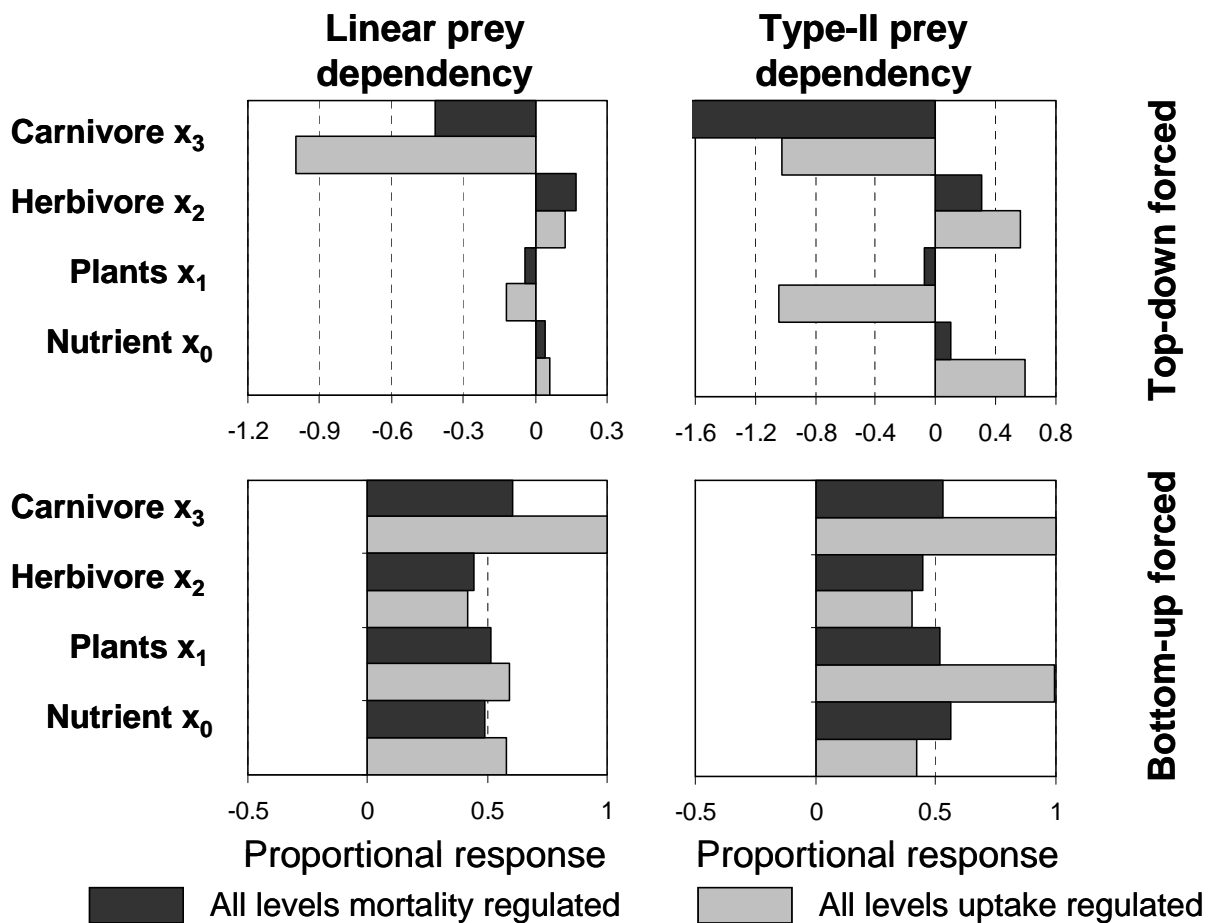

Supplement: ele0017-0101-SD2.pdf [file ele0017-0101-SD2.pdf]
